# Supplementary material for: Fast lithium-ion storage of Nb2O5 nanocrystals in situ grown on carbon nanotubes for high-performance asymmetric supercapacitors
Source: Royal Society of Chemistry journal article supplement (doi:10.1039/c5ra05140a), 2015-01-01
Supplement: c5ra05140a1.pdf [file c5ra05140a1.pdf]

Supporting Information

**Fast Lithium-ion Storage of Nb<sub>2</sub>O<sub>5</sub> nanocrystals *in situ* Grown on Carbon Nanotubes for High-performance Asymmetric Supercapacitors**

*Xiaolei Wang,<sup>a</sup> Ge Li,<sup>a</sup> Ricky Tjandra,<sup>a</sup> Xingye Fan,<sup>a</sup> Xingcheng Xiao<sup>b</sup> and Aiping Yu<sup>\*a</sup>*

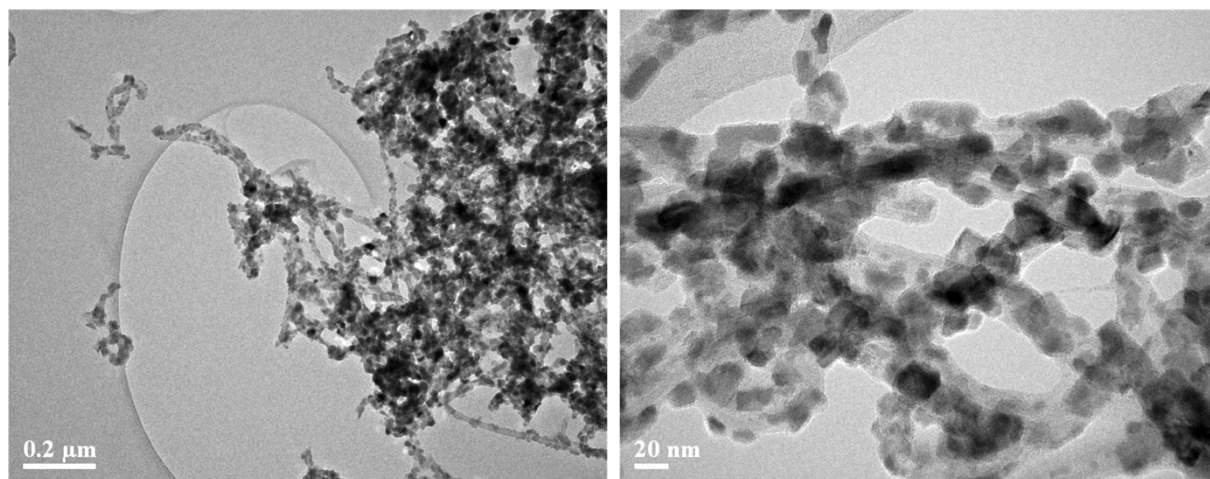

**Figure S1.** TEM images of the CNT/Nb<sub>2</sub>O<sub>5</sub> nanocomposites. To further demonstrate the *in situ* growth and intimate contact, the sample was dispersed in ethanol under ultrasonication for 12 h. There are no isolated or separated Nb<sub>2</sub>O<sub>5</sub> nanocrystals that can be observed.

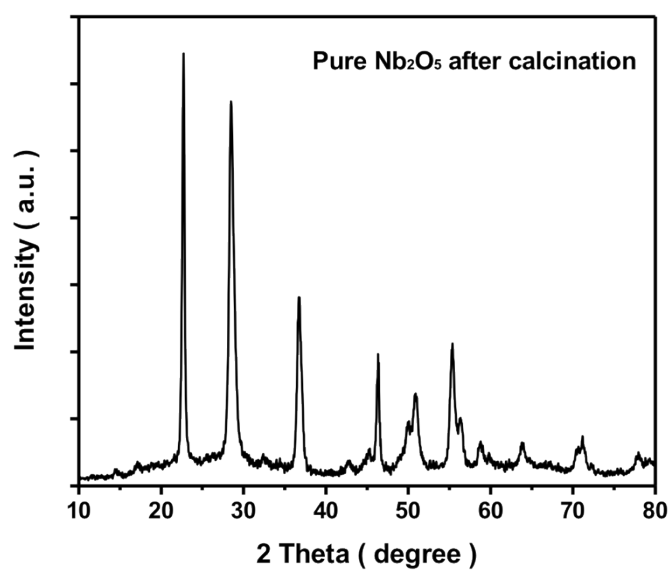

**Figure S2.** XRD pattern of pure Nb<sub>2</sub>O<sub>5</sub> synthesized at identical condition to CNT/Nb<sub>2</sub>O<sub>5</sub> nanocomposites.

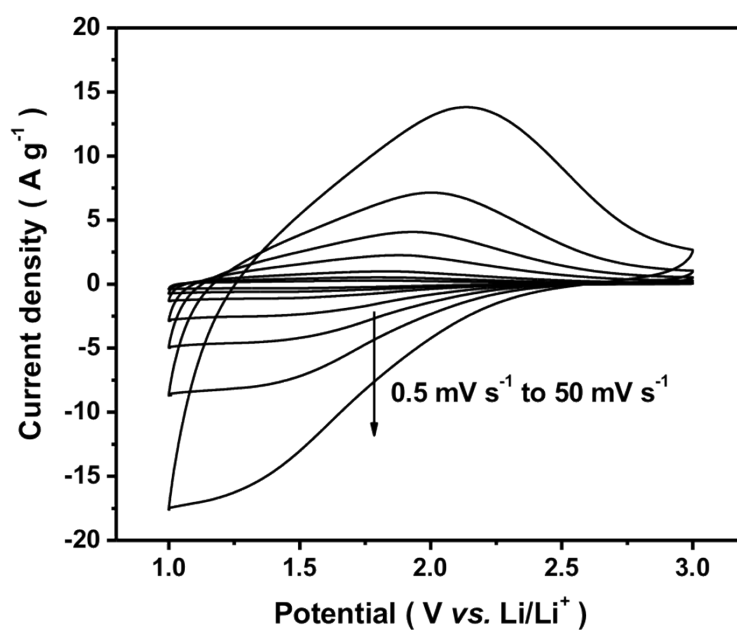

**Figure S2.** CV curves of the CNT/Nb<sub>2</sub>O<sub>5</sub> composite electrode at various potential scanning rates from 0.5 to 50 mV s<sup>-1</sup> at room temperature.

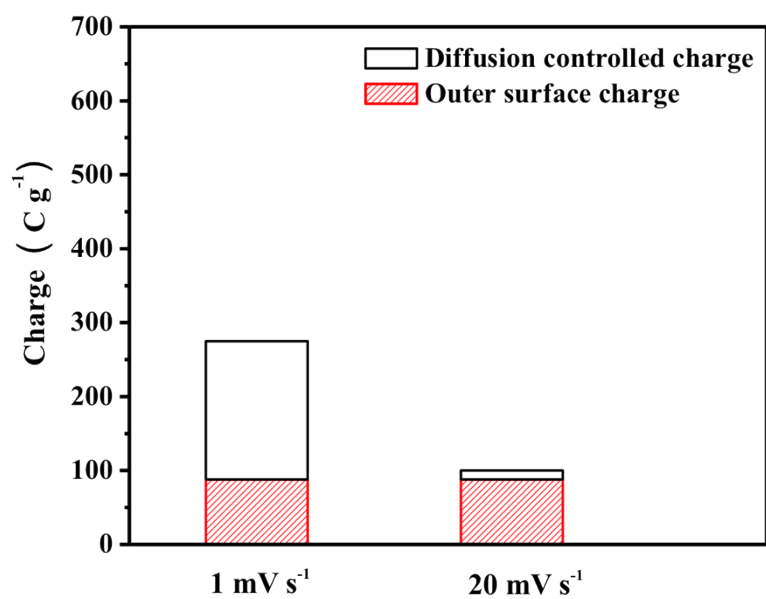

**Figure S4.** Analysis of the total charge stored on the electrode based on pure Nb<sub>2</sub>O<sub>5</sub> nanocrystals synthesized through identical condition.
